# Supplementary material for: Early manifestations and differential gene expression associated with photoreceptor degeneration in Prom1-deficient retina
Source: Oxford University Press journal article supplement (doi:10.1242/dmm.048962), 2021-10-19
Supplement: dmm048962supp.pdf [file dmm048962supp.pdf]

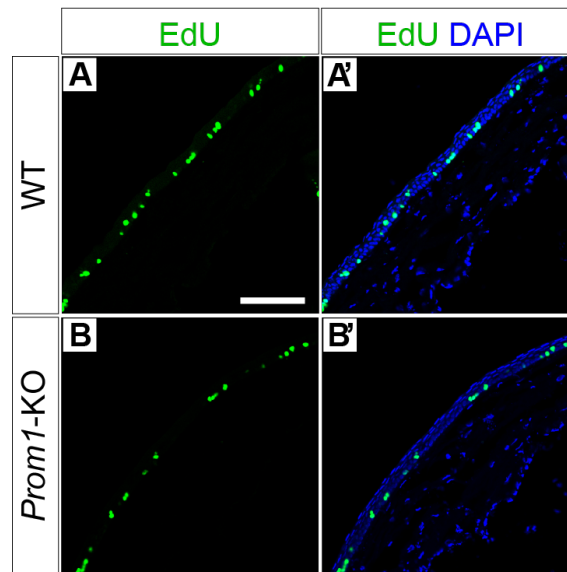

**Fig. S1. Intraperitoneally injected EdU reaches the eye.** The cornea of the WT (A,A') and *Prom1*-KO (B,B') eyes examined in Fig. 2H-H'' and Fig. 2I-I'', respectively, was examined for incorporation of EdU-positive cells. Nuclei were stained with DAPI. Scale bar in (A) is 100  $\mu$ m and applies to all images.

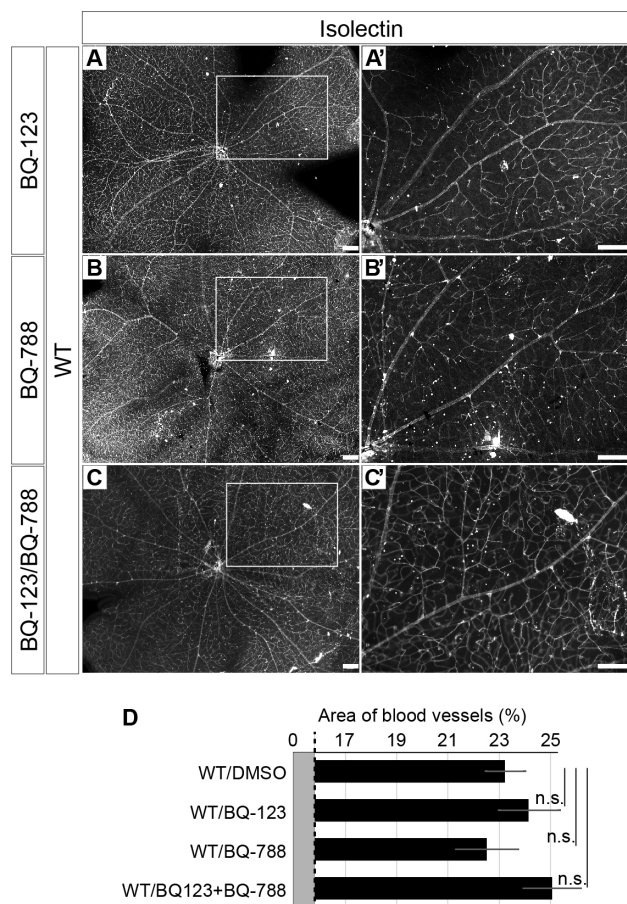

**Fig. S2. Endothelin receptor antagonists do not affect retinal vessels of WT mice.** (A-C') Isolectin staining of the retina of WT mice treated with BQ-123 (A,A'), BQ-788 (B,B'), or both agents (C,C') as in Fig. 5 and 6. The boxed regions of (A,B,C) are shown at higher magnification in (A',B',C'), respectively. Scale bars, 100  $\mu$ m. (D) Area of blood vessels measured in images similar to those in (A) to (C'). Data are means  $\pm$  s.e.m. for five retinas per condition. Note that the data for WT/DMSO are the same as those in Fig. 6F. n.s., not significant (one-way ANOVA followed by Tukey's post hoc test).

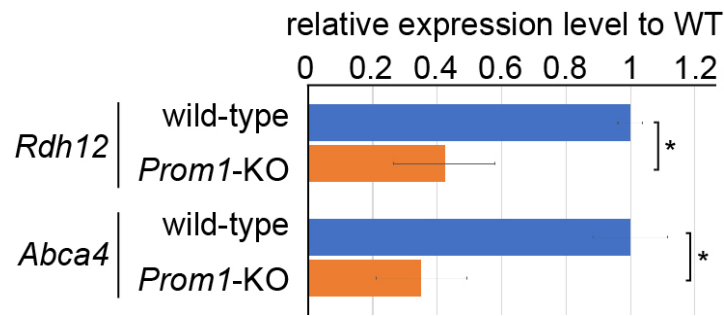

**Fig. S3. Expression of *Rdh12* and *Abca4* is down-regulated in the retina of *Prom1*-KO mice at P14.** The retina of WT or *Prom1*-KO mice at P14 was subjected to RT-qPCR analysis of *Rdh12* and *Abca4* expression. Data are means  $\pm$  s.e.m. for three retinas per condition. \* $P < 0.05$  (two-tailed Student's *t* test.)

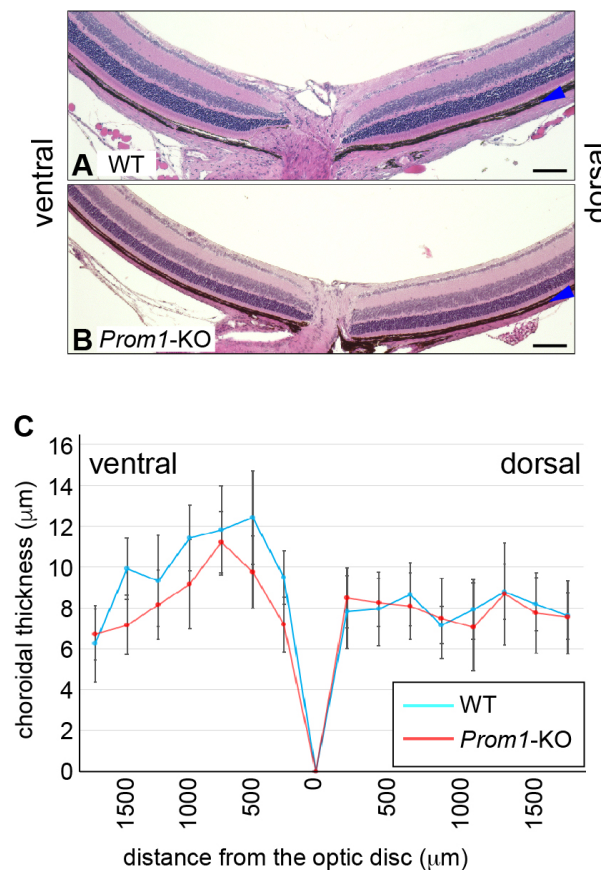

**Fig. S4. Choroidal thickness is similar for WT and *Prom1*-KO mice at 4 weeks of age.** (A,B) Hematoxylin-eosin staining of the retinas of WT (A) and *Prom1*-KO (B) mice at 4 weeks of age. Blue arrowheads indicate the choroid. Scale bars, 100  $\mu$ m. (C) Choroidal thickness in sections similar to those in (A) and (B) was measured every 250  $\mu$ m from the optic disc. Data are means  $\pm$  s.e.m. for four retinas per condition. No significant difference was apparent between the values for the two genotypes at each distance examined (two-tailed Student's *t* test).

**Table S1. RNA-sequencing analysis of the retina of *Prom1*-KO and WT mice at P14.**

[Click here to download Table S1](#)

**Table S2. RNA-sequencing analysis of the retina of *Prom1*-KO and WT mice at P21.**

[Click here to download Table S2](#)

**Table S3. Complete list of pathways affected in the retina of *Prom1*-KO mice at P21 according to GO term analysis.**

[Click here to download Table S3](#)

**Table S4. Sequences of PCR primers used for this study.**

| Gene         | Gene ID | Forward                | Reverse                   |
|--------------|---------|------------------------|---------------------------|
| <i>Edn2</i>  | 13615   | GGACATCATCTGGGTGAACA   | CAGAAGGTAGCACAGGCAGA      |
| <i>Bcl3</i>  | 12051   | TGCTGAACCTGCCTACTCAC   | CAGCGCTATGTTATTCTGG       |
| <i>Gfap</i>  | 14580   | TGGAGGAGGAGATCCAGTTC   | GAGTGCGAATCTCTCTCAGG      |
| <i>Gapdh</i> | 14433   | ACAACCTTTGGCATTGTGGAA  | GATGCAGGGATGATGTTCTG      |
| <i>Rdh12</i> | 77974   | CCAGGAACTCCTACCTGCTG   | ACCCACATCCTCTTGCAGTC      |
| <i>Abca4</i> | 11304   | GGAAGTACAGACATTGCCTGCA | AGAAGTCCACATCGGCATACAGAGT |
